# Supplementary material for: CRISPR/Cas9 mediated deletion of the adenosine A2A receptor enhances CAR T cell efficacy
Source: PubMed Central journal article supplement (PMC8163771; doi:10.1038/s41467-021-23331-5), 2021-05-28
Supplement: 41467_2021_23331_MOESM3_ESM.pdf [file 41467_2021_23331_MOESM3_ESM.pdf]

Descriptions of Additional Supplementary Files

**Supplementary data 1**

**Description:** Adenosine signature in murine CAR T cells.

**Supplementary data 2**

**Description:** Adenosine signature in human CAR T cells.
